# Supplementary material for: Molecular mechanisms and design principles for promiscuous inhibitors to avoid drug resistance: Lessons learned from HIV‐1 protease inhibition
Source: PubMed Central journal article supplement — Proteins. 2015 Jan 7;83(2):351–72. doi: 10.1002/prot.24730 (PMC4829108; doi:10.1002/prot.24730), 2015-01-07

Molecular Mechanisms and Design Principles for Promiscuous Inhibitors to Avoid Drug  
Resistance: Lessons Learned from HIV-1 Protease Inhibition

(Short Title: Promiscuous Inhibitors to Avoid Resistance)

Yang Shen<sup>1,#</sup>, Mala L. Radhakrishnan<sup>2</sup>, Bruce Tidor<sup>1\*</sup>

<sup>1</sup> Department of Biological Engineering, Department of Electrical Engineering and  
Computer Science, and Computer Science and Artificial Intelligence Laboratory, Massachusetts  
Institute of Technology, Cambridge, Massachusetts 02139

<sup>2</sup> Department of Chemistry, Wellesley College, Wellesley, Massachusetts 02482

<sup>#</sup> Current Address: Toyota Technological Institute at Chicago, Chicago, Illinois 60637

\* Email: [tidor@mit.edu](mailto:tidor@mit.edu)

### **Supplementary Material**

**Keywords:** binding specificity; molecular mechanisms; drug resistance; drug design  
principles; drug cocktails

**Figure S1.** Pairwise distributions of physicochemical measures for inhibitors. Blue and red symbols correspond to selective (coverage  $\leq 4$ ) and promiscuous (coverage  $\geq 9$ ) inhibitors, respectively; cyan ones correspond to inhibitors of intermediate binding promiscuity.

**Figure S2.** Distributions of physicochemical measures for designed inhibitors across coverage bins. Compared to **Figure 4**, an entropic component was introduced here into the binding energy calculation with an approximation of 0.4 kcal/mol per rotatable bond for designed inhibitors.

**Figure S3.** Comparison of physicochemical properties of selective and promiscuous inhibitor sets. Compared to **Figure 5**, entropic loss of inhibitors was introduced as 0.4 kcal/mol per rotatable bond.

**Figure S4.** Distributions of normalized flexibility score for designed inhibitors across coverage bins when increasing parameters for entropic loss of inhibitors were used: (A) 0.4 (as in Figure S2A) ; (B) 1.0; (C) 1.5; and (D) 2.0 kcal/mol per rotatable bond.

**Figure S1.** Pairwise distributions of physicochemical measures for inhibitors. Blue and red symbols correspond to selective (coverage  $\leq 4$ ) and promiscuous (coverage  $\geq 9$ ) inhibitors, respectively; cyan ones correspond to inhibitors of intermediate binding promiscuity.

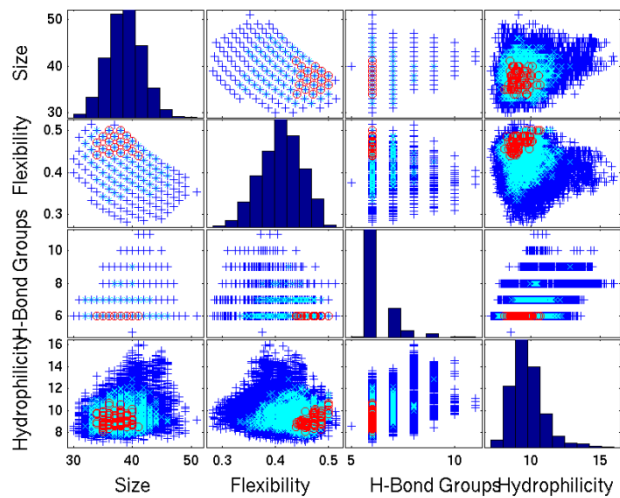

**Figure S2.** Distributions of physicochemical measures for designed inhibitors across coverage bins. Compared to **Figure 2**, an entropic component was introduced here into the binding energy calculation with an approximation of 0.4 kcal/mol per rotatable bond for designed inhibitors.

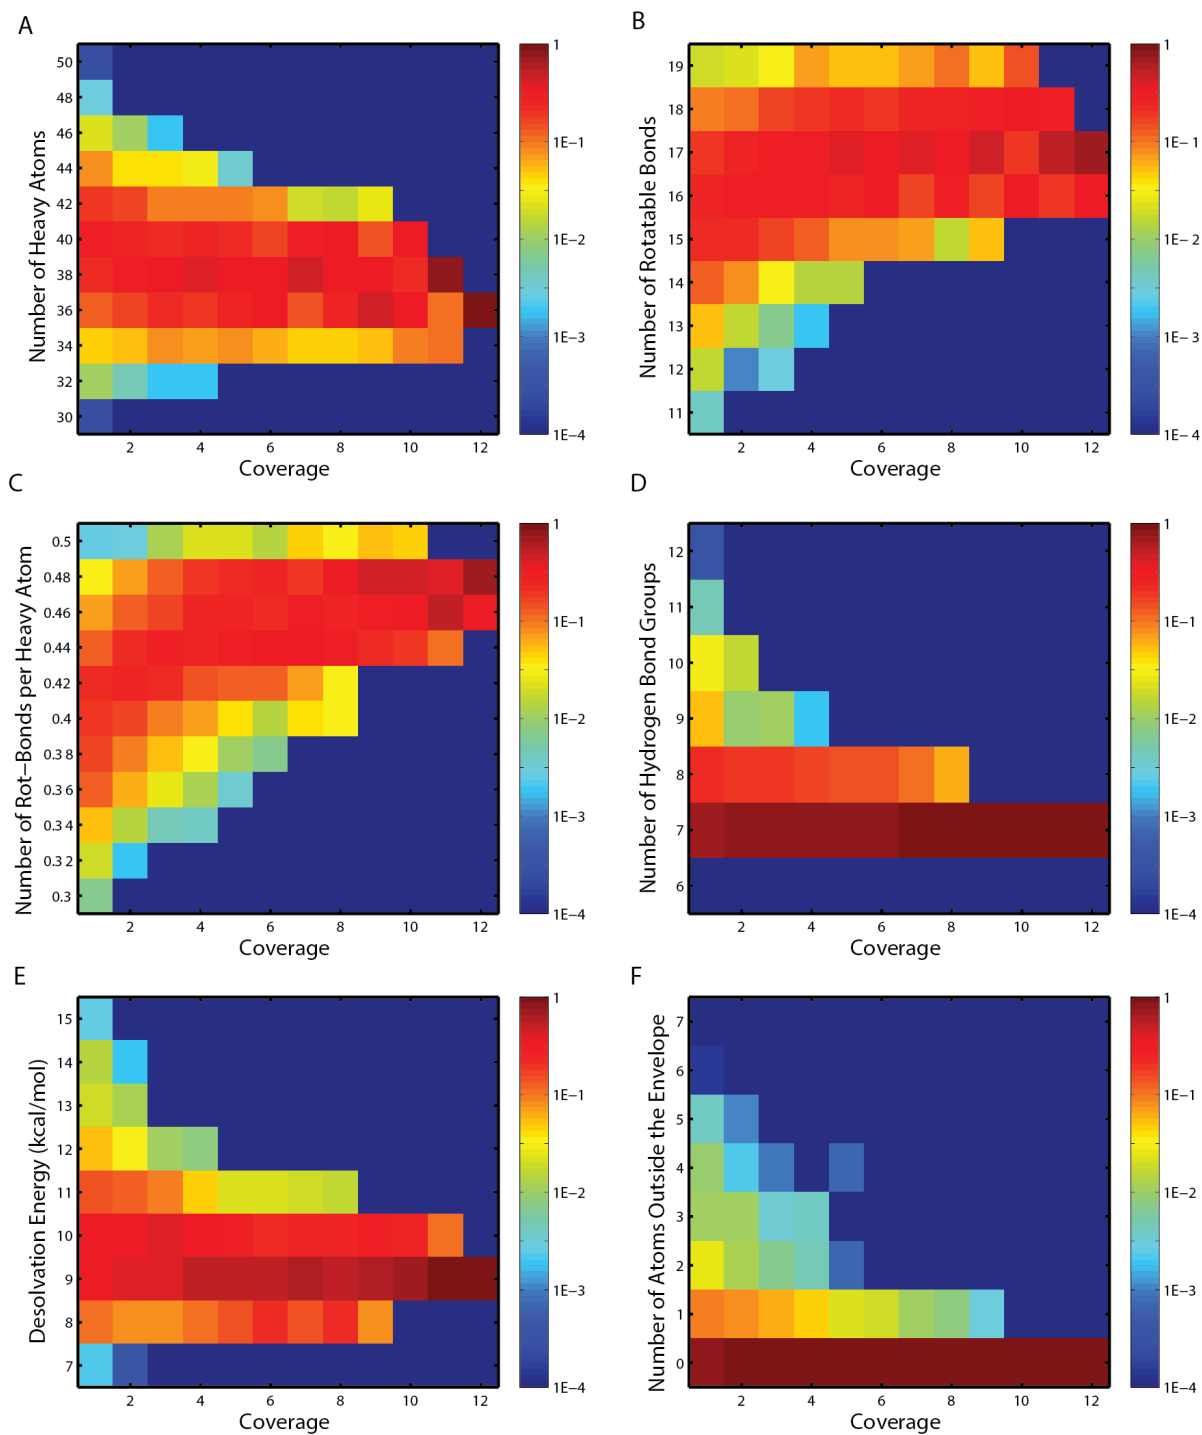

**Figure S3.** Comparison of physicochemical properties of selective and promiscuous inhibitor sets. Compared to **Figure 3**, entropic loss of inhibitors was introduced.

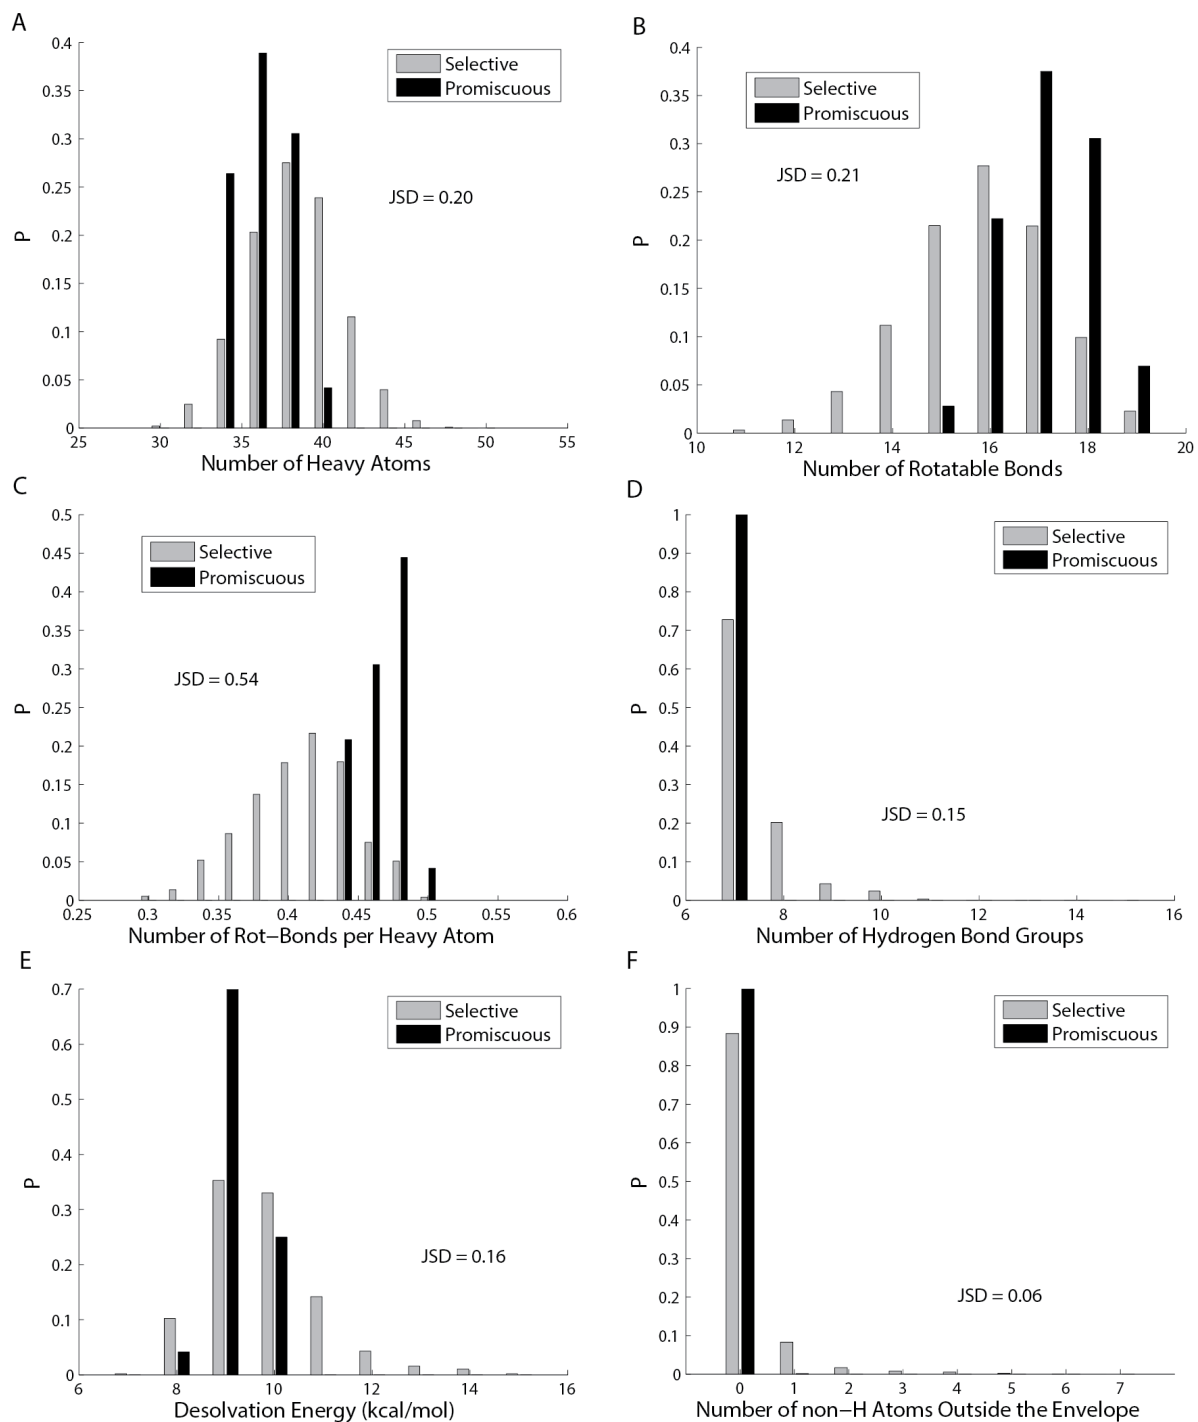

**Figure S4.** Distributions of normalized flexibility score for designed inhibitors across coverage bins when increasing parameters for entropic loss of inhibitors were used: (A) 0.4 (as in Figure S2A) ; (B) 1.0; (C) 1.5; and (D) 2.0 kcal/mol per rotatable bond.

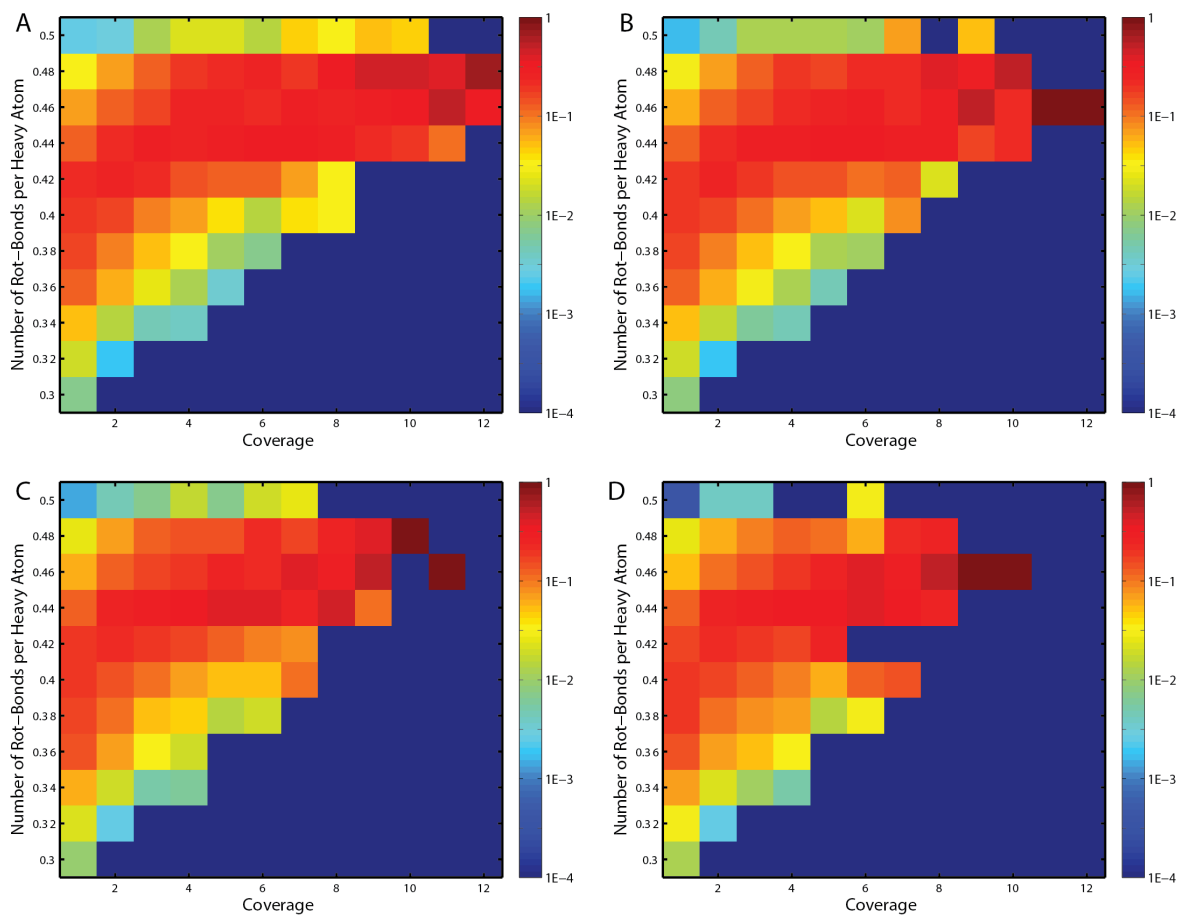

Supplement: NIHMS774861-supplement-Supplementary_Information.pdf [file NIHMS774861-supplement-Supplementary_Information.pdf]
